# Supplementary material for: Synergetic effects of hydrogenation and acidic sites in phosphorus-modified nickel catalysts for the selective conversion of furfural to cyclopentanone
Source: Royal Society of Chemistry journal article supplement (doi:10.1039/d0cy01943g), 2020-11-11
Supplement: d0cy01943g1.pdf [file d0cy01943g1.pdf]

## Supporting Information

### **Synergetic effects of hydrogenation and acidic sites in phosphorus modified nickel catalyst for selective conversion of furfural to cyclopentanone**

Guoming Gao<sup>a</sup>, Yuewen Shao<sup>a</sup>, Yong Gao<sup>a</sup>, Tao Wei<sup>a</sup>, Guanggang Gao<sup>a</sup>, Shu Zhang<sup>b</sup>, Yi Wang<sup>c</sup>,  
Qifeng Chen<sup>a,\*</sup>, Xun Hu<sup>a,\*</sup>

<sup>a</sup>School of Material Science and Engineering, University of Jinan, Jinan, 250022, P. R. China.

<sup>b</sup>College of Materials Science and Engineering, Nanjing Forestry University, Nanjing 210037, Jiangsu, china.

<sup>c</sup>State Key Laboratory of Coal Combustion, Huazhong University of Science and Technology, Wuhan, 430074, P.R. China.

\*Corresponding author. Tel. / fax: +86-531-89736201 (X. Hu); E-mail: [qfchen@126.com](mailto:qfchen@126.com) (Q. Chen); E-mail: [Xun.Hu@outlook.com](mailto:Xun.Hu@outlook.com) (X. Hu).

Number of Table: 8

Number of Figures: 5

Number of Pages: 14

**Table S1** Deconvoluted peaks of Ni 2p over different samples.

| Sample | Peak                                                | Position (eV) | Area | (%)  |
|--------|-----------------------------------------------------|---------------|------|------|
| 0%P    | Ni <sup>δ+</sup> been reduced by H <sub>2</sub>     | 855.6         | 1889 | 78.8 |
|        | Ni <sup>2+</sup> not been reduced by H <sub>2</sub> | 862.0         | 507  | 21.2 |
| 10%P   | Ni <sup>δ+</sup> been reduced by H <sub>2</sub>     | 855.6         | 455  | 5.7  |
|        | Ni <sup>δ+</sup> in nickel phosphide phase          | 856.2         | 3879 | 48.4 |
|        | Ni <sup>2+</sup> ions with phosphate ions           | 862.1         | 3680 | 45.9 |
| 25%P   | Ni <sup>δ+</sup> been reduced by H <sub>2</sub>     | 855.6         | 270  | 1.8  |
|        | Ni <sup>δ+</sup> in nickel phosphide phase          | 856.8         | 8563 | 55.7 |
|        | Ni <sup>2+</sup> ions with phosphate ions           | 861.8         | 6538 | 42.5 |

**Table S2** Deconvoluted peaks of Ni 2p over different samples.

| Sample | Peak                                                                               | Position (eV) | Area | Total | (%)  |
|--------|------------------------------------------------------------------------------------|---------------|------|-------|------|
| 0%P    | *                                                                                  | *             | *    |       | *    |
| 10%P   | reduced P $\delta^1$ -                                                             | 133.2         | 867  | 3659  | 23.7 |
|        | reduced P $\delta^2$ - ( $\delta^2 > \delta^1$ -)                                  | 133.9         | 1155 |       | 31.6 |
|        | H <sub>2</sub> PO <sub>3</sub> <sup>-</sup><br>(passivated layer of Ni-P catalyst) | 134.6         | 1637 |       | 44.7 |
| 25%P   | reduced P $\delta^1$ -                                                             | 133.6         | 3964 | 8737  | 45.5 |
|        | reduced P $\delta^2$ - ( $\delta^2 > \delta^1$ -)                                  | 134.4         | 2759 |       | 31.7 |
|        | H <sub>2</sub> PO <sub>3</sub> <sup>-</sup><br>(passivated layer of Ni-P catalyst) | 135.0         | 1984 |       | 22.8 |

**Table S3** Distribution of acidic sites over the nickel catalysts obtained by NH<sub>3</sub>-TPD (NH<sub>3</sub> uptake)

| Entry          | Catalyst    | Weak acidity<br>( $\mu\text{mol/g}$ ) | Medium strong<br>acidity<br>( $\mu\text{mol/g}$ ) | Strong<br>acidity<br>( $\mu\text{mol/g}$ ) | Total acidity<br>( $\mu\text{mol/g}$ ) |
|----------------|-------------|---------------------------------------|---------------------------------------------------|--------------------------------------------|----------------------------------------|
| 1 <sup>a</sup> | 15%P -5%Ni  | 2.24                                  | 3.62                                              | 0                                          | 5.86                                   |
| 2 <sup>a</sup> | 15%P -10%Ni | 2.24                                  | 3.66                                              | 0                                          | 5.90                                   |
| 3 <sup>a</sup> | 15%P -15%Ni | 3.60                                  | 3.81                                              | 0                                          | 7.41                                   |
| 4 <sup>a</sup> | 15%P -20%Ni | 2.82                                  | 3.69                                              | 0.45                                       | 6.97                                   |
| 5 <sup>a</sup> | 15%P -25%Ni | 6.95                                  | 3.37                                              | 0.54                                       | 10.86                                  |
| 6 <sup>a</sup> | 15%P -30%Ni | 7.00                                  | 2.87                                              | 0.68                                       | 10.54                                  |

<sup>a</sup>P-Ni/Al<sub>2</sub>O<sub>3</sub> catalyst with loading P species first.

**Table S4** Distribution of the products during hydrogenation of furfural over the P-Ni/Al<sub>2</sub>O<sub>3</sub> catalyst with loading P species first at 110°C<sup>a</sup>

| Entry | Catalyst <sup>b</sup> | Con. (%) | Yield (mol%) |      |      |     | Total (%) | FA Selectivity (%) |
|-------|-----------------------|----------|--------------|------|------|-----|-----------|--------------------|
|       |                       |          | CPO          | FA   | TFA  | CPL |           |                    |
| 1     | 15%P-0%Ni             | 1.1      | 0            | 0.3  | 0.0  | 0.0 | 0.3       | 27.3               |
| 2     | 15%P-5%Ni             | 2.5      | 0.2          | 1.0  | 0.0  | 0.0 | 1.2       | 40.0               |
| 3     | 15%P-10%Ni            | 41.0     | 6.4          | 28.5 | 0.0  | 0.0 | 34.9      | 69.5               |
| 4     | 15%P-15%Ni            | 62.1     | 11.0         | 39.9 | 0.0  | 0.0 | 50.9      | 64.3               |
| 5     | 15%P-20%Ni            | 59.0     | 12.5         | 32.7 | 0.0  | 0.0 | 45.2      | 55.4               |
| 6     | 15%P-25%Ni            | 19.3     | 8.6          | 5.0  | 0.0  | 2.2 | 15.8      | 25.9               |
| 7     | 15%P-30%Ni            | 16.3     | 7.6          | 3.5  | 0.0  | 2.0 | 13.1      | 21.5               |
| 8     | 0%P-30%Ni             | 70.9     | 0            | 0    | 56.8 | 0.0 | 56.8      | 0.0                |

<sup>a</sup>Reaction conditions: furfural loaded: 0.42 mmol, deionized water loaded: 3.96 g, catalyst loaded: 0.04g,  $P_0$  (H<sub>2</sub>) = 3 MPa (at room temperature), T = 110°C, reaction time: 2 h.

<sup>b</sup>P-Ni/Al<sub>2</sub>O<sub>3</sub> catalyst with loading P species first.

**Table S5** Distribution of the products during hydrogenation of furfural over the P-Ni/Al<sub>2</sub>O<sub>3</sub> catalyst with loading P species first at 130°C<sup>a</sup>

| Entry | Catalyst <sup>b</sup> | Con. (%) | Yield (mol%) |     |         |      | Total (%) | CPO Selectivity (%) |
|-------|-----------------------|----------|--------------|-----|---------|------|-----------|---------------------|
|       |                       |          | CPO          | FA  | TF<br>A | CPL  |           |                     |
| 1     | 15%P-0%Ni             | 0        | 0.0          | 0.0 | 0.0     | 0.0  | 0.0       | 0                   |
| 2     | 15%P-5%Ni             | 13       | 5.97         | 0.0 | 0.0     | 2.6  | 8.6       | 45.9                |
| 3     | 15%P-10%Ni            | 75.2     | 53.1         | 5.9 | 0.0     | 0.0  | 59.0      | 70.6                |
| 4     | 15%P-15%Ni            | 68.6     | 38.7         | 4.2 | 0.0     | 6.6  | 49.4      | 56.4                |
| 5     | 15%P-20%Ni            | 45.0     | 15.1         | 0.3 | 0.0     | 15.6 | 31.0      | 33.6                |
| 6     | 15%P-25%Ni            | 43.3     | 16.7         | 0.3 | 0.0     | 19.2 | 36.2      | 38.6                |
| 7     | 15%P-30%Ni            | 44.2     | 18.2         | 1.0 | 0.0     | 24.2 | 43.4      | 41.2                |
| 8     | 0%P-30%Ni             | 100.0    | 0.0          | 0.0 | 73.2    | 0.0  | 73.2      | 0.0                 |

<sup>a</sup>Reaction conditions: furfural loaded: 0.42 mmol, deionized water loaded: 3.96 g, catalyst loaded: 0.04g,  $P_0$  (H<sub>2</sub>) = 3 MPa (at room temperature), T = 130°C, reaction time: 2 h.

<sup>b</sup>P-Ni/Al<sub>2</sub>O<sub>3</sub> catalyst with loading P species first.

**Table S6** Distribution of the products during hydrogenation of furfural over the P-Ni/Al<sub>2</sub>O<sub>3</sub> catalyst with loading P species first at 150°C<sup>a</sup>

| Entry <sup>a</sup> | Catalyst <sup>b</sup>                    | Con. (%) | Yield (mol%) |     |      |      | Total, % (CPO+CPL) | Selectivity of CPL (%) |
|--------------------|------------------------------------------|----------|--------------|-----|------|------|--------------------|------------------------|
|                    |                                          |          | CPO          | FA  | TFA  | CPL  |                    |                        |
| 1                  | 15%P-0%Ni                                | 6.2      | 0            | 0   | 0    | 0    | 0                  |                        |
| 2                  | 15%P-5%Ni                                | 19.3     | 15.7         | 0.8 | 0    | 0    | 15.7               |                        |
| 3                  | 15%P-10%Ni                               | 83.5     | 69.6         | 3.4 | 0    | 4.1  | 70.1               |                        |
| 4                  | 15%P-15%Ni                               | 88.1     | 72.8         | 1.1 | 0    | 1.7  | 74.5               |                        |
| 5                  | 15%P-20%Ni                               | 79.5     | 3.2          | 0.2 | 0    | 58.5 | 61.7               |                        |
| 6                  | 15%P-25%Ni                               | 70.1     | 2.0          | 0.7 | 0    | 50.2 | 52.2               |                        |
| 7                  | 15%P-30%Ni                               | 69.0     | 16.8         | 0.6 | 0    | 39.3 | 56.14              |                        |
| 8                  | 0%P-30%Ni                                | 100.0    | 0            | 0   | 71.4 | 0    | 0                  |                        |
| 9                  | $\gamma$ -Al <sub>2</sub> O <sub>3</sub> | 3.2      | 0            | 0   | 0    | 0    | 0                  |                        |

<sup>a</sup>Reaction conditions: furfural loaded: 0.42 mmol, deionized water loaded: 3.96 g, catalyst loaded: 0.04g,  $P_0$  (H<sub>2</sub>) = 3 MPa (at room temperature), T = 150°C, reaction time: 2 h.

<sup>b</sup>P-Ni/Al<sub>2</sub>O<sub>3</sub> catalyst with loading P species first.

**Table S7** Product distribution in the furfural hydrogenation catalyzed by different Ni-P/ $\gamma$ -Al<sub>2</sub>O<sub>3</sub> catalysts at 190°C<sup>a</sup>

| Entry | Catalyst <sup>b</sup> | Con. (%) | Yield (mol%) |     |      |      | Total (%) | CPL Selectivity (%) |
|-------|-----------------------|----------|--------------|-----|------|------|-----------|---------------------|
|       |                       |          | CPO          | FA  | TFA  | CPL  |           |                     |
| 1     | 15%Ni-0%P             | 100.0    | 0.0          | 0.0 | 73.6 | 0.0  | 73.6      | 0.0%                |
| 2     | 15%Ni-1%P             | 100.0    | 0.2          | 0.0 | 65.3 | 0.0  | 65.5      | 0.0                 |
| 3     | 15%Ni-3%P             | 100.0    | 1.4          | 0.0 | 62.4 | 0.0  | 63.8      | 0.0                 |
| 4     | 15%Ni-5%P             | 97.2     | 24.0         | 1.2 | 0.0  | 59.0 | 84.2      | 60.7                |
| 5     | 15%Ni-10%P            | 100.0    | 1.8          | 5.7 | 0.0  | 22.1 | 29.6      | 22.1                |
| 6     | 15%Ni-15%P            | 99.8     | 3.4          | 0.4 | 0.0  | 58.6 | 62.4      | 58.7                |
| 7     | 15%Ni-20%P            | 97.2     | 7.6          | 1.0 | 0.0  | 49.0 | 57.6      | 50.4                |
| 8     | 15%Ni-25%P            | 97.6     | 72.4         | 0.3 | 0.0  | 21.1 | 93.8      | 21.6                |
| 9     | 15%Ni-30%P            | 98.0     | 54.3         | 0.7 | 0.0  | 9.4  | 64.4      | 0.0                 |

<sup>a</sup>Reaction conditions: furfural loaded: 0.42 mmol, deionized water loaded: 3.96 g, catalyst loaded: 0.04g,  $P_0$  (H<sub>2</sub>) = 3 MPa (at room temperature), T = 190°C, reaction time: 2 h.

<sup>b</sup>Ni-P/Al<sub>2</sub>O<sub>3</sub> catalyst with loading nickel first.



**Table S8** Distribution of the products during hydrogenation of furfural over the P-Ni/Al<sub>2</sub>O<sub>3</sub> catalyst with loading P species first at 190°C<sup>a</sup>

| Entry | Catalyst <sup>b</sup> | Con. (%) | Yield (mol%) |     |      |      | Total (%) | FA Selectivity (%) |
|-------|-----------------------|----------|--------------|-----|------|------|-----------|--------------------|
|       |                       |          | CPO          | FA  | TFA  | CPL  |           |                    |
| 1     | 15%P-0%Ni             | 29.4     | 1.3          | 0.0 | 0.0  | 0.9  | 2.2       | 3.1                |
| 2     | 15%P-5%Ni             | 95.9     | 64.7         | 0.3 | 0.0  | 6.4  | 71.4      | 6.7                |
| 3     | 15%P-10%Ni            | 100.0    | 8.4          | 0.2 | 0.0  | 40.9 | 49.5      | 40.9               |
| 4     | 15%P-15%Ni            | 99.8     | 3.4          | 0.4 | 0.0  | 49.0 | 52.8      | 49.1               |
| 5     | 15%P-20%Ni            | 99.9     | 0.5          | 0.2 | 0.0  | 44.1 | 44.8      | 44.1               |
| 6     | 15%P-25%Ni            | 99.8     | 0.5          | 1.2 | 0.0  | 16.6 | 18.3      | 16.6               |
| 7     | 15%P-30%Ni            | 99.3     | 0.5          | 0.5 | 0.0  | 22.6 | 23.6      | 22.8               |
| 8     | 0%P-30%Ni             | 99.9     | 0.0          | 0.0 | 58.3 | 0.0  | 58.3      | 0.0                |

<sup>a</sup>Reaction conditions: furfural loaded: 0.42 mmol, deionized water loaded: 3.96 g, catalyst loaded: 0.04g,  $P_0$  (H<sub>2</sub>) = 3 MPa (at room temperature), T = 190°C, reaction time: 2 h.

<sup>b</sup>P-Ni/Al<sub>2</sub>O<sub>3</sub> catalyst with loading P species first.

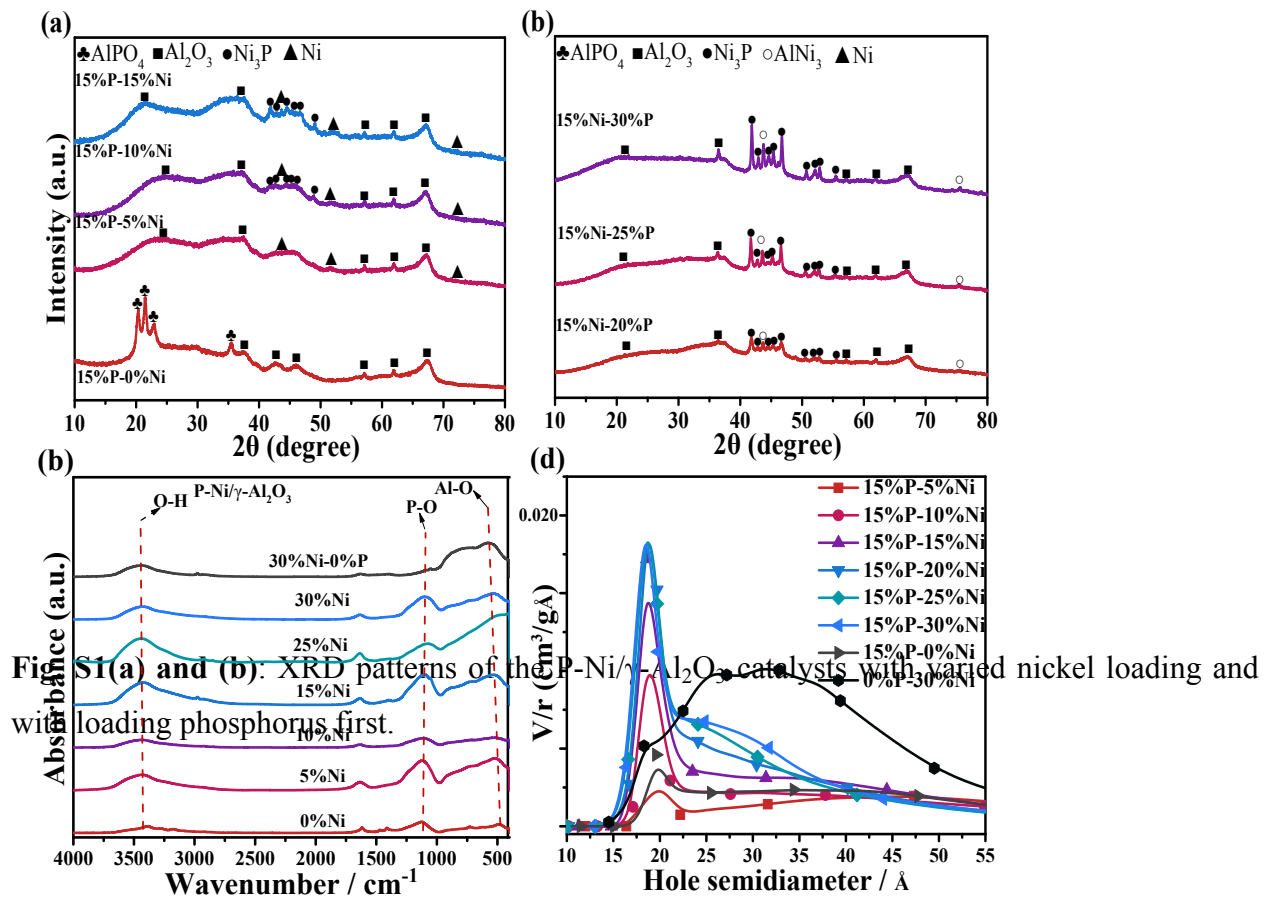

Fig. S1(a) and (b): XRD patterns of the P-Ni/ $\gamma$ -Al<sub>2</sub>O<sub>3</sub> catalysts with varied nickel loading and with loading phosphorus first.

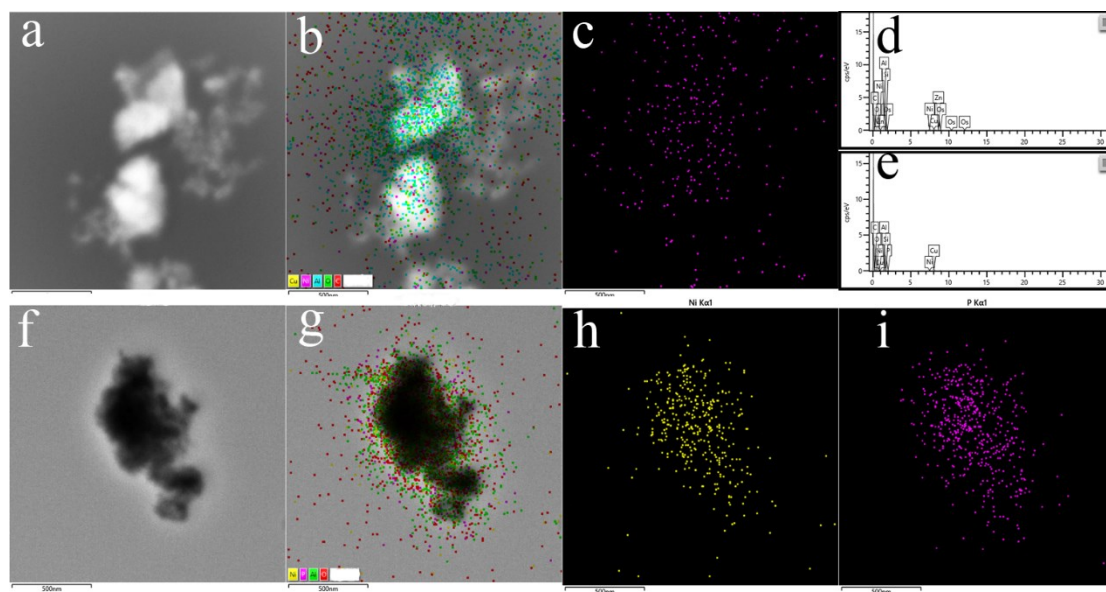

**Fig. S2(a)**

**and (b):** XRD patterns of the P-Ni/γ-Al<sub>2</sub>O<sub>3</sub> catalysts with varied nickel loading and with loading phosphorus first.

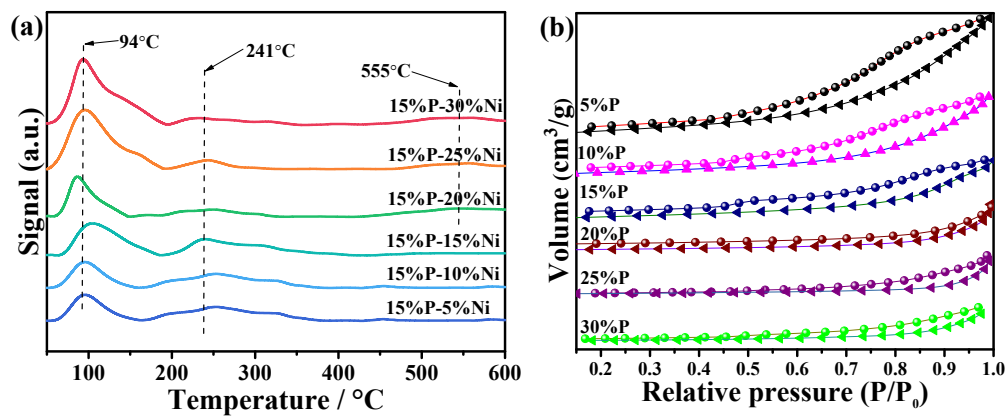

**Fig. S3 (a):** NH<sub>3</sub>-TPD spectra for the P-Ni/ $\gamma$ -Al<sub>2</sub>O<sub>3</sub> (loading P first) catalyst. **(b):** Isothermal adsorption curve (BET) of Ni-P/ $\gamma$ -Al<sub>2</sub>O<sub>3</sub> (loading Ni first) .

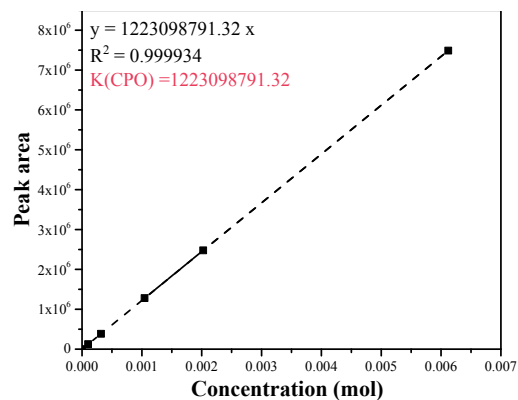

**Fig. S4** The external standard curve of CPO.

Instructions on the external standard method:

1. Preparation of standard samples: CPO was diluted with acetone to a specified concentration (0.2%, 0.1%, 0.06%, 0.03%, 0.01%). Then, K (CPO) was calculated based on the concentration and peak area of CPO.
2. The liquid products were diluted with acetone until the concentration met the requirements in external standard curve.
3. Calculate the yield and selectivity of CPO in the liquid products. CPL and other liquid products were tested and calculated in the same way.

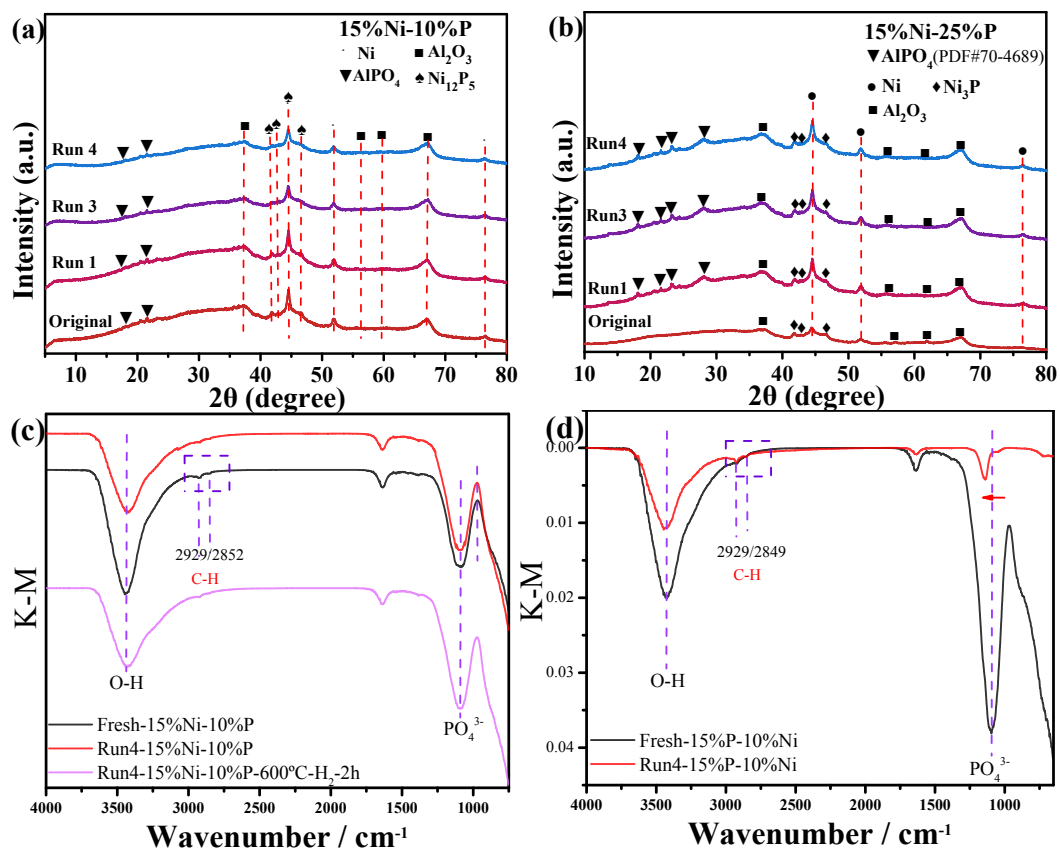

**Fig. S5** Recyclability test in the furfural hydrogenation catalyzed by 15Ni-10%P/ $\gamma$ - $\text{Al}_2\text{O}_3$  and 15Ni-25%P/ $\gamma$ - $\text{Al}_2\text{O}_3$  catalysts. Reaction conditions: furfural loaded: 0.42 mmol, deionized water loaded: 3.96 g, catalyst loaded: 0.04 g,  $\text{H}_2$ : 3MPa,  $T = 150^\circ\text{C}$ , reaction time: 2 h.

**(a)**: XRD patterns of the 15Ni-10%P/ $\gamma$ - $\text{Al}_2\text{O}_3$  catalyst after the recyclability test at 150°C.

**(b)**: XRD patterns of the 15Ni-25%P/ $\gamma$ - $\text{Al}_2\text{O}_3$  catalyst after the recyclability test at 190°C.

**(c)-(d)**: FT-IR spectra of 15%Ni-10%P and 15%P-10%Ni catalysts in cyclic stability experiments.
